# Supplementary material for: Predictive Value of Measures of Vascular Calcification Burden and Progression for Risk of Death in Incident to Dialysis Patients
Source: PubMed Central journal article supplement (PMC7863918; doi:10.3390/jcm10030376), 2021-01-20
Supplement: jcm-10-00376-s001.pdf [file jcm-10-00376-s001.pdf]

## Supplemental material

**Table S1:** comparisons between subjects enrolled in the Independent study with and without evaluation of abdominal aorta calcification (AAC) via the method described by Kauppila et al<sup>10</sup>

|                                 | Total (n=466)          | Without Kauppila (n=282) | With Kauppila (n=184)   |                    |
|---------------------------------|------------------------|--------------------------|-------------------------|--------------------|
| Variable                        | Mean (SD) or n (%)     | Mean (SD) or n (%)       | Mean (SD) or n (%)      | P-Value            |
| <b>Age (years)</b>              | <b>65.26 (14.78)</b>   | <b>66.98 (13.83)</b>     | <b>62.63 (15.8)</b>     | <b>0.002</b>       |
| Male sex (%)                    | 49.57% (231)           | 48.58% (137)             | 51.09% (94)             | 0.664              |
| Body weight (Kg)                | 69.63 (14.1)           | 70.47 (14.63)            | 68.34 (13.19)           | 0.105              |
| <b>Diabetes (yes vs no)</b>     | <b>29.61% (138)</b>    | <b>34.75%(98)</b>        | <b>21.74% (40)</b>      | <b>0.004</b>       |
| Systolic Blood pressure (mmHg)  | 136.01 (18.29)         | 136.39 (18.03)           | 135.42 (18.7)           | 0.579              |
| Diastolic Blood pressure (mmHg) | 75.84 (9.44)           | 75.81 (9.22)             | 75.9 (9.78)             | 0.923              |
| <b>CAC (Agatston units)</b>     | <b>283.41 (790.33)</b> | <b>92.51 (343.75)</b>    | <b>575.98 (1124.04)</b> | <b>&lt; 0.0001</b> |
| Pulse Wave velocity (m/sec)     | 9.18 (3)               | 8.96 (2.35)              | 9.52 (3.77)             | 0.07               |
| QTc (msec)                      | 408.96 (35.2)          | 406.99 (37.3)            | 411.98 (31.59)          | 0.121              |
| QTd (msec)                      | 28.31 (12.91)          | 27.15 (11.87)            | 30.09 (14.21)           | 0.021              |

Legend: CAC: Coronary Artery Calcification; QTc and QTd QT tract at electrocardiogram (EKG)

**Table S2A:** independent predictors of all-cause mortality in the study cohort 1. Variables forced into the model were selected based on available evidence and univariate analyses (table 1, variable with p<.15). Fully adjusted cox model (to predict all-cause of death): adjusted for Kauppila score, log(volume score) + PWV+ age + Framingham score + diabetes + ASCVD + Systolic Blood pressure + serum phosphate + serum calcium + serum sodium + serum PTH + use of ARBs + Use of betablockers +use of vitamin D + use of calcium based phosphate binder+ use of calcium channel blockers + use of cinacalcet.

| Variable                                    | HR            | lower .95     | upper .95    | Pr(> z )         |
|---------------------------------------------|---------------|---------------|--------------|------------------|
| Kauppila score per 1 unit increase          | 0.9781        | 0.9192        | 1.041        | 0.4855           |
| <b>log(volume score) per 1 log increase</b> | <b>1.8082</b> | <b>1.3486</b> | <b>2.424</b> | <b>&lt;0.001</b> |
| <b>Pulse wave velocity (PWV) (m/sec)</b>    | <b>1.0898</b> | <b>0.9979</b> | <b>1.19</b>  | <b>&lt;0.001</b> |
| Age (years)                                 | 1.0181        | 0.9841        | 1.053        | 0.2996           |
| Framingham score (per 1 unit increase)      | 0.9825        | 0.8297        | 1.164        | 0.838            |
| <b>Diabetes (yes vs no)</b>                 | <b>2.8998</b> | <b>1.2826</b> | <b>6.556</b> | <b>0.011</b>     |
| ASCVD (yes vs no)                           | 0.5691        | 0.2558        | 1.266        | 0.1671           |
| Systolic blood pressure (mmHg)              | 1.0098        | 0.995         | 1.025        | 0.1953           |
| Serum phosphate (mg/dl)                     | 1.052         | 0.8625        | 1.283        | 0.617            |
| Serum Calcium (mg/dl)                       | 0.8909        | 0.6347        | 1.251        | 0.5044           |
| Serum sodium (mEq/l)                        | 1.0363        | 0.9486        | 1.132        | 0.4295           |

|                                                         |               |               |              |              |
|---------------------------------------------------------|---------------|---------------|--------------|--------------|
| Parathyroid Hormone (iPTH) (pg/ml)                      | 1.0004        | 0.9994        | 1.001        | 0.4272       |
| Use of Angiotensin Receptor Blockers (ARBs) (yes vs no) | 1.1667        | 0.4845        | 2.809        | 0.731        |
| Use of beta-blockers (yes vs no)                        | 0.8832        | 0.4863        | 1.604        | 0.6835       |
| Use of vitamin D (yes vs no)                            | 0.7688        | 0.4323        | 1.367        | 0.3708       |
| Use of calcium based phosphate binder (yes vs no)       | 1.9395        | 0.5371        | 7.004        | 0.3119       |
| <b>Use of calcium channel blockers (yes vs no)</b>      | <b>1.7561</b> | <b>0.9514</b> | <b>3.241</b> | <b>0.072</b> |
| Use of cinacalcet (yes vs no)                           | 1.0687        | 0.6232        | 1.832        | 0.8092       |

**Table legend:** ASCVD atherosclerotic cardiovascular disease defined if any of the following clinical data was reported: history of cerebrovascular disease; peripheral vascular disease; angina pectoris; history of myocardial infarction; aortic aneurysm; history of percutaneous coronary angioplasty with or without stenting; PWV pulse wave velocity; ARB: angiotensin receptor blockers; PTH: parathyroid hormone.

**Table S2B:** The most parsimonious model was then selected via a stepwise methods

| Variable                                          | HR            | lower .95     | upper .95    | Pr(> z )       |
|---------------------------------------------------|---------------|---------------|--------------|----------------|
| <b>log(CAC score) per 1 log increase</b>          | <b>1.730</b>  | <b>1.447</b>  | <b>2.069</b> | <b>0.000</b>   |
| <b>Pulse Wave velocity (m/sec)</b>                | <b>1.0968</b> | <b>1.0082</b> | <b>1.193</b> | <b>0.03158</b> |
| Age (years)                                       | 1.0167        | 0.9967        | 1.037        | 0.10152        |
| <b>Diabetes (yes vs no)</b>                       | <b>3.1042</b> | <b>1.4553</b> | <b>6.622</b> | <b>0.00338</b> |
| ASCVD (yes vs no)                                 | 0.5692        | 0.282         | 1.149        | 0.11584        |
| Systolic blood pressure (mmHg)                    | 1.0103        | 0.9966        | 1.024        | 0.13968        |
| Use of calcium based phosphate binder (yes vs no) | 2.6029        | 0.8045        | 8.421        | 0.11029        |
| Use of calcium channel blockers (yes vs no)       | 1.6822        | 0.9516        | 2.974        | 0.07356        |

**Table legend:** CAC: coronary artery calcification; ASCVD atherosclerotic cardiovascular disease defined if any of the following clinical data was reported: history of cerebrovascular disease; peripheral vascular disease; angina pectoris; history of myocardial infarction; aortic aneurysm; history of percutaneous coronary angioplasty with or without stenting.

**Reference**

10 Kauppila, L.I.; Polak, J.F.; Cupples, L.A.; Hannan, M.T.; Kiel, D.P.; Wilson PW. New indices to classify location, severity and progression of calcific lesions in the abdominal aorta: A 25-year follow-up study. *Atherosclerosis* **1997**, *132*, 245–250.
